# Supplementary material
Source: Research Square preprint supplement (doi:10.21203/rs.3.rs-9050350/v1)
Supplement: Supplementary file 1 [file faef7b128649b5314a807d64.docx]

**Supplementary Materials**

| Sr. No. | Symbolic presentation of protein | Name of target protein | PDB ID | Methods for 3D structure determination | No of chain | Resolution (Å) |
| --- | --- | --- | --- | --- | --- | --- |
| 1 | TP53 | TP53-binding protein 1 | 8SWJ | X-ray diffraction | **A, B, C, and D** | 1.60 |
| 2 | ERBB2 | Protein MEMO1 | 3BCZ | X-ray diffraction | **A, B, C, and D** | 2.10 |
| 3 | PTEN | Phosphoinositide phosphatase | 1D5R | X-ray diffraction | A | 2.10 |
| 4 | CDKN2A | Protein arginine N-methyltransferase 5 | 5FA5 | X-ray diffraction | A | 2.34 |
| 5 | BRCA1 | BRCA1-associated RING domain protein 1 | 3FA2 | X-ray diffraction | A, and B | 2.20 |
| 6 | ESR1 | Estrogen receptor | 6PSJ | X-ray diffraction | A, and B | 1.20 |
| 7 | MYC | C-Myc-binding protein | 2YY0 | X-ray diffraction | A, B, C, and D | 2.40 |
| 8 | CDH1 | Chromodomain-helicase-DNA-binding protein- | 4B4C | X-ray diffraction | A | 1.62 |
| 9 | EGFR | Anti EGFR antibody FV region | 1WT5 | X-ray diffraction | A, and B | 2.10 |
| 10 | EGF | Protein jagged-2 | 5MWF | X-ray diffraction | A, B, C, D, and E | 2.80 |

**Supplementary Table 1:** Description of three-dimensional structure of ranked hub target proteins related to breast cancer by using RCSB PDB database.

|  | Protein arginine N-methyltransferase 5 | Phosphoinositide phosphatase PTEN | Protein MEMO1 | TP53-binding protein-1 | Jagged-2 signaling protein | BRCA1-associated RING domain protein-1 | C-Myc-binding protein | Chromodomain-helicase-DNA-binding protein 1 | Anti-EGFR antibody FV region | Estrogen receptor |
| --- | --- | --- | --- | --- | --- | --- | --- | --- | --- | --- |
| Ethyl iso-allocholate | -7.8 | -7.8 | -7.9 | -7.4 | -7.4 | -6.5 | -6.7 | -6.6 | -6 | -7 |
| Benzyl butyl Phthalate | -8.5 | -7.7 | -6.3 | -7.2 | -5.4 | -5.8 | -5.4 | -5.9 | -6.1 | -6.9 |
| 1-((1-butoxypropan-2-yl)oxy)propan-2-ol | -4.9 | -4.7 | -4.4 | -4.1 | -4.1 | -4.3 | -4.5 | -3.8 | -4 | -4.5 |
| Phenylacetaldehyde | -5.2 | -5.7 | -5.9 | -5.9 | -5.4 | -4.8 | -4.9 | -5.2 | -4.6 | -5.2 |
| Linoleic acid | -4.9 | -5 | -5.2 | -4.8 | -4.4 | -5.1 | -4.8 | -5 | -4.2 | -5 |
| Caryophyllene | -7.7 | -6.8 | -6.3 | -7.8 | -5.7 | -6.1 | -5.2 | -5.6 | -5.7 | -6.5 |
| Acetic acid | -6.8 | -6.2 | -6.4 | -6 | -5.1 | -5.4 | -5.5 | -5.6 | -5.3 | -6.1 |
| 2,4-di-tert-butylphenol | -6.6 | -6 | -5.7 | -5.4 | -6.1 | -5.7 | -5.3 | -5.4 | -5.2 | -6.4 |
| Isoeugenol | -5.9 | -5.7 | -6.6 | -5.4 | -5.5 | -5.2 | -5 | -5.9 | -4.8 | -6.1 |
| 1,2-benzenedicarboxylic acid bis(2-methylpropyl)ester | -7.3 | -6.6 | -5.4 | -6.5 | -5.4 | -5.4 | -4.7 | -5.7 | -5.4 | -6.1 |
| 2,3-dimethyl-5-(trifluoromethyl)benzene-1,4-diol | -6.7 | -6 | -7.7 | -5.2 | -6 | -6.8 | -5.8 | -5.8 | -5.2 | -6.6 |
| Tetraacetyl-d-xylonic nitrile | -5.4 | -5.6 | -5 | -4.9 | -5 | -5.4 | -4.8 | -5.1 | -4.2 | -6.5 |
| Valiparib | -7.1 | -7.1 | -7.3 | -6.4 | -6.4 | -6.7 | -6.3 | -6.6 | -5.4 | -8.4 |
| Capecitebine | -6.6 | -7.6 | -6.3 | -6.1 | -6.6 | -6.6 | -6.4 | -6.2 | -5.8 | -7.4 |

**Supplementary Table 2:** Binding affinity in -kcal/mol of potential orally active compounds of *P. sajor caju* and ranked hub target proteins associated with breast cancer in humans.
