# Supplementary material
Source: Research Square preprint supplement (doi:10.21203/rs.3.rs-9050350/v1)

**Graphical Abstract**

**
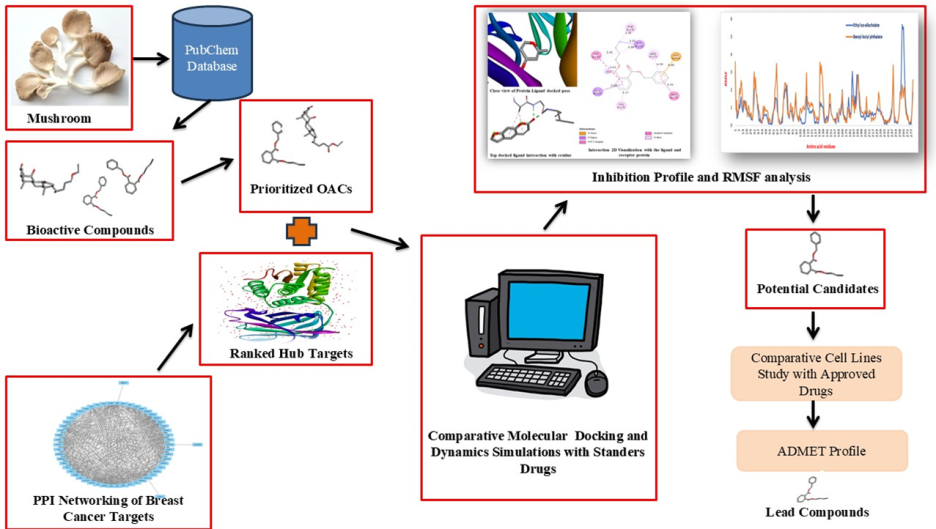
**

Supplement: Supplementary file 1 [file 9e0360157bed8f00de8a73df.docx]
